# Supplementary material for: Ionic liquid effects on a multistep process. Increased product formation due to enhancement of all steps
Source: Royal Society of Chemistry journal article supplement (doi:10.1039/c5ob01214g), 2015-01-01
Supplement: c5ob01214g1.pdf [file c5ob01214g1.pdf]

## Supporting Information:

# Ionic liquid effects on a multistep process: increased product formation due to enhancement of all steps

*Sinead T. Keaveney, Ronald S. Haines and Jason B. Harper*

## Table of Contents

|                                                                                                                                                                                            |    |
|--------------------------------------------------------------------------------------------------------------------------------------------------------------------------------------------|----|
| <b>p-Methylbenzaldehyde 2b and Hexan-1-amine 3</b> .....                                                                                                                                   | 2  |
| Addition rate constant ( $k_{2,A}$ ) data in [Bmim][N(CF <sub>3</sub> SO <sub>2</sub> ) <sub>2</sub> ] 1 and acetonitrile at 8.1°C.....                                                    | 2  |
| <b>p-Chlorobenzaldehyde 2d and Hexan-1-amine 3</b> .....                                                                                                                                   | 4  |
| Addition ( $k_{2,A}$ ), reverse addition ( $k_{1,A}$ ) and elimination ( $k_{1,E}$ ) data in [Bmim][N(CF <sub>3</sub> SO <sub>2</sub> ) <sub>2</sub> ] 1 and acetonitrile at 8.1°C.....    | 4  |
| <b>p-Trifluoromethylbenzaldehyde 2e and Hexan-1-amine 3</b> .....                                                                                                                          | 6  |
| Addition ( $k_{2,A}$ ), reverse addition ( $k_{1,A}$ ) and elimination ( $k_{1,E}$ ) data in [Bmim][N(CF <sub>3</sub> SO <sub>2</sub> ) <sub>2</sub> ] 1 and acetonitrile at 8.1°C.....    | 6  |
| <b>p-Nitrobenzaldehyde 2f and Hexan-1-amine 3</b> .....                                                                                                                                    | 8  |
| Addition ( $k_{2,A}$ ), reverse addition ( $k_{1,A}$ ) and elimination ( $k_{1,E}$ ) data in [Bmim][N(CF <sub>3</sub> SO <sub>2</sub> ) <sub>2</sub> ] 1 and acetonitrile at 8.1°C.....    | 8  |
| <b>Hammett Plots:</b> .....                                                                                                                                                                | 10 |
| Acetonitrile using the rate constant of the addition step ( $k_{2,A}$ ).....                                                                                                               | 10 |
| [Bmim][N(CF <sub>3</sub> SO <sub>2</sub> ) <sub>2</sub> ] 1 and acetonitrile, $\chi_{IL} = 0.9$ , using the rate constant of the addition step ( $k_{2,A}$ ).....                          | 10 |
| [Bmim][N(CF <sub>3</sub> SO <sub>2</sub> ) <sub>2</sub> ] 1 and acetonitrile, $\chi_{IL} = 0.2$ , using the rate constant of the elimination step ( $k_{1,E}$ ).....                       | 11 |
| [Bmim][N(CF <sub>3</sub> SO <sub>2</sub> ) <sub>2</sub> ] 1 and acetonitrile, $\chi_{IL} = 0.9$ , using the rate constant of the elimination step ( $k_{1,E}$ ).....                       | 12 |
| [Bmim][N(CF <sub>3</sub> SO <sub>2</sub> ) <sub>2</sub> ] 1 and acetonitrile, $\chi_{IL} = 0.2$ , using the rate constant of the reverse addition step ( $k_{1,A}$ ).....                  | 12 |
| [Bmim][N(CF <sub>3</sub> SO <sub>2</sub> ) <sub>2</sub> ] 1 and acetonitrile, $\chi_{IL} = 0.9$ , using the rate constant of the reverse addition step ( $k_{1,A}$ ).....                  | 13 |
| [Bmim][N(CF <sub>3</sub> SO <sub>2</sub> ) <sub>2</sub> ] 1 and acetonitrile, $\chi_{IL} = 0.9$ , using the rate constant of the overall addition elimination process ( $k_{2,app}$ )..... | 13 |
| <b>Activation Parameter Data</b> .....                                                                                                                                                     | 14 |
| <p><i>p</i>-Chlorobenzaldehyde 2d and hexan-1-amine 3, addition step (<math>k_{2,A}</math>).....</p>                                                                                       | 14 |
| <p><i>p</i>-Chlorobenzaldehyde 2d and hexan-1-amine 3, elimination step (<math>k_{1,E}</math>).....</p>                                                                                    | 15 |
| <p><i>p</i>-Trifluoromethylbenzaldehyde 2e and hexan-1-amine 3, elimination step (<math>k_{1,E}</math>) .....</p>                                                                          | 16 |
| <p><i>p</i>-Nitrobenzaldehyde 2f and hexan-1-amine 3, elimination step (<math>k_{1,E}</math>) .....</p>                                                                                    | 17 |

## *p*-Methylbenzaldehyde **2b** and Hexan-1-amine **3**

Addition rate constant ( $k_{2,A}$ ) data in [Bmim][N(CF<sub>3</sub>SO<sub>2</sub>)<sub>2</sub>] **1** and acetonitrile at 8.1°C

| Mole Fraction of <b>1</b> | [Nu] / mol L <sup>-1</sup> | $k_{1,A} / 10^{-4} \text{ s}^{-1}$ | $k_{2,A} / 10^{-4} \text{ L mol}^{-1} \text{ s}^{-1}$ | Average $k_{2,A} / 10^{-4} \text{ L mol}^{-1} \text{ s}^{-1}$ |
|---------------------------|----------------------------|------------------------------------|-------------------------------------------------------|---------------------------------------------------------------|
| 0                         | 0.140                      | 0.331                              | 2.37                                                  | 2.70 (0.29)                                                   |
|                           |                            | 0.402                              | 2.88                                                  |                                                               |
|                           |                            | 0.400                              | 2.86                                                  |                                                               |
| 0.11                      | 0.158                      | 1.559                              | 9.86                                                  | 10.05 (0.88)                                                  |
|                           |                            | 1.740                              | 11.01                                                 |                                                               |
|                           |                            | 1.467                              | 9.28                                                  |                                                               |
| 0.21                      | 0.150                      | 2.296                              | 15.28                                                 | 14.61 (0.62)                                                  |
|                           |                            | 2.175                              | 14.48                                                 |                                                               |
|                           |                            | 2.111                              | 14.05                                                 |                                                               |
| 0.31                      | 0.146                      | 2.709                              | 18.52                                                 | 18.67 (0.22)                                                  |
|                           |                            | 2.767                              | 18.92                                                 |                                                               |
|                           |                            | 2.717                              | 18.58                                                 |                                                               |
| 0.42                      | 0.152                      | 2.780                              | 18.33                                                 | 18.59 (0.39)                                                  |
|                           |                            | 2.791                              | 18.40                                                 |                                                               |
|                           |                            | 2.889                              | 19.05                                                 |                                                               |
| 0.51                      | 0.167                      | 3.455                              | 20.75                                                 | 20.38 (0.33)                                                  |
|                           |                            | 3.353                              | 20.14                                                 |                                                               |
|                           |                            | 3.371                              | 20.24                                                 |                                                               |
| 0.62                      | 0.147                      | 3.531                              | 24.06                                                 | 24.42 (1.18)                                                  |
|                           |                            | 3.444                              | 23.46                                                 |                                                               |
|                           |                            | 3.776                              | 25.73                                                 |                                                               |
| 0.70                      | 0.154                      | 4.208                              | 27.38                                                 | 27.39 (0.25)                                                  |
|                           |                            | 4.248                              | 27.64                                                 |                                                               |
|                           |                            | 4.172                              | 27.15                                                 |                                                               |
| 0.80                      | 0.146                      | 4.566                              | 31.32                                                 | 30.32 (1.29)                                                  |
|                           |                            | 4.487                              | 30.78                                                 |                                                               |
|                           |                            | 4.207                              | 28.86                                                 |                                                               |
| 0.91                      | 0.144                      | 4.091                              | 28.36                                                 | 28.33 (0.13)                                                  |
|                           |                            | 4.067                              | 28.19                                                 |                                                               |
|                           |                            | 4.105                              | 28.45                                                 |                                                               |

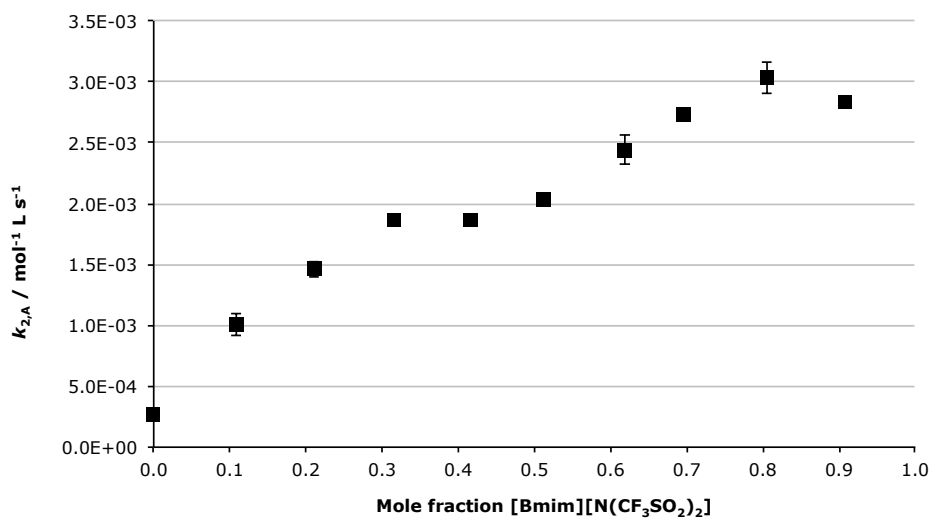

**Figure S1:** The bimolecular rate constant for the rate-determining addition step ( $k_{2,A}$ ) between 4-methylbenzaldehyde **2b** and the amine **3** in different mole fractions of [Bmim][N(CF<sub>3</sub>SO<sub>2</sub>)<sub>2</sub>] **1** in acetonitrile at 281 K. Uncertainties are reported as the standard deviation of three replicates.

## *p*-Chlorobenzaldehyde **2d** and Hexan-1-amine **3**

Addition ( $k_{2,A}$ ), reverse addition ( $k_{-1,A}$ ) and elimination ( $k_{1,E}$ ) data in [Bmim][N(CF<sub>3</sub>SO<sub>2</sub>)<sub>2</sub>] **1** and acetonitrile at 8.1°C

| Mole Fraction of <b>1</b> | [Nu] / mol L <sup>-1</sup> | $k_{1,A} / 10^{-3}$ s <sup>-1</sup> | $k_{2,A} / 10^{-3}$ L mol <sup>-1</sup> s <sup>-1</sup> | $k_{-1,A} / 10^{-3}$ s <sup>-1</sup> | $k_{1,E} / 10^{-3}$ s <sup>-1</sup> | $(k_{2,A} \times k_{1,E}) \div (k_{-1,A} + k_{1,E}) /$ L mol <sup>-1</sup> s <sup>-1</sup> |
|---------------------------|----------------------------|-------------------------------------|---------------------------------------------------------|--------------------------------------|-------------------------------------|--------------------------------------------------------------------------------------------|
| 0                         | 0.147                      | 1.046                               | 7.12                                                    | 7.42                                 | 1.76                                | 1.37                                                                                       |
|                           |                            | 0.952                               | 6.49                                                    | 7.64                                 | 1.61                                | 1.13                                                                                       |
|                           |                            | 0.970                               | 6.61                                                    | 7.46                                 | 1.80                                | 1.29                                                                                       |
| 0.22                      | 0.325                      | 11.2                                | 34.6                                                    | 39.9                                 | 2.01                                | 1.66                                                                                       |
|                           |                            | 10.5                                | 32.3                                                    | 38.9                                 | 1.96                                | 1.55                                                                                       |
|                           |                            | 10.3                                | 31.7                                                    | 39.0                                 | 2.00                                | 1.55                                                                                       |
| 0.88                      | 0.405                      | 15.9                                | 39.3                                                    | 38.3                                 | 1.76                                | 1.72                                                                                       |
|                           |                            | 15.2                                | 37.5                                                    | 38.6                                 | 1.53                                | 1.43                                                                                       |
|                           |                            | 14.3                                | 35.4                                                    | 38.5                                 | 1.90                                | 1.66                                                                                       |

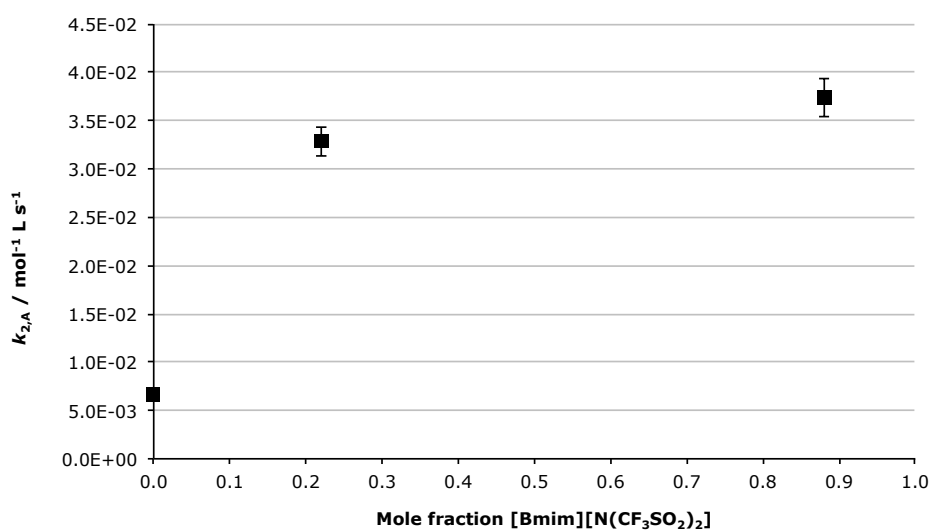

**Figure S2:** The bimolecular rate constant for the addition step ( $k_{2,A}$ ) of the reaction between 4-chlorobenzaldehyde **2d** and the amine **3** in different mole fractions of [Bmim][N(CF<sub>3</sub>SO<sub>2</sub>)<sub>2</sub>] **1** in acetonitrile at 281 K. Uncertainties are reported as the standard deviation of three replicates.

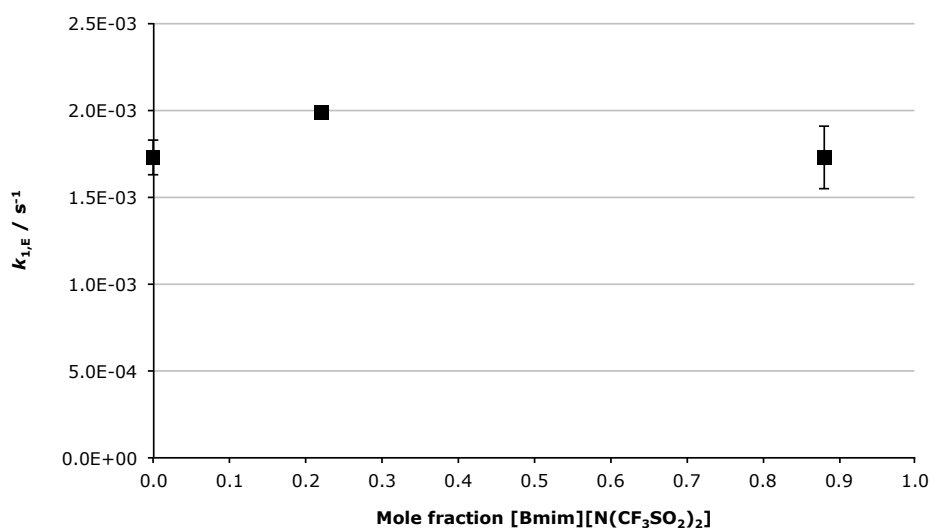

**Figure S3:** The unimolecular rate constant for the elimination step ( $k_{1,E}$ ) of the reaction between 4-chlorobenzaldehyde **2d** and the amine **3** in different mole fractions of [Bmim][N(CF<sub>3</sub>SO<sub>2</sub>)<sub>2</sub>] **1** in acetonitrile at 281 K. Uncertainties are reported as the standard deviation of three replicates.

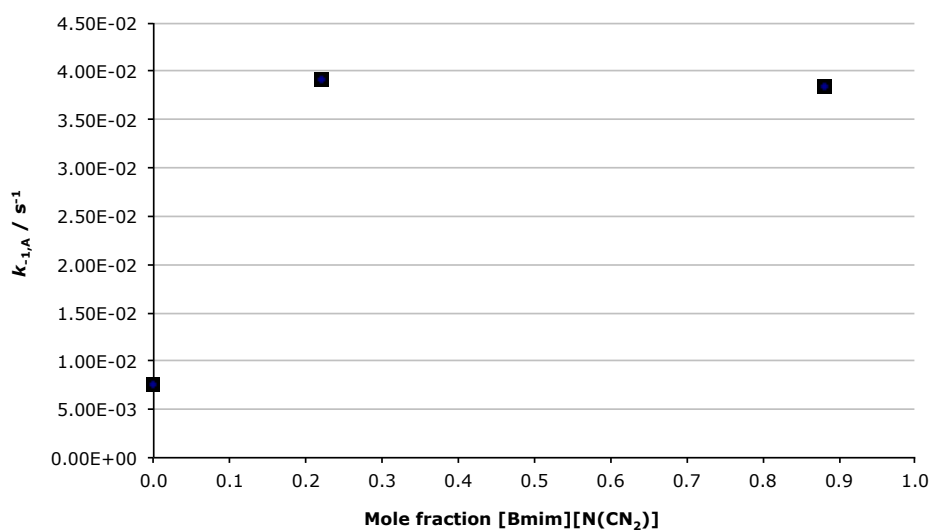

**Figure S4:** The unimolecular rate constant for the reverse addition step ( $k_{-1,A}$ ) of the reaction between 4-chlorobenzaldehyde **2d** and the amine **3** in different mole fractions of [Bmim][N(CF<sub>3</sub>SO<sub>2</sub>)<sub>2</sub>] **1** in acetonitrile at 281 K. Uncertainties are reported as the standard deviation of three replicates.

## *p*-Trifluoromethylbenzaldehyde **2e** and Hexan-1-amine **3**

Addition ( $k_{2,A}$ ), reverse addition ( $k_{-1,A}$ ) and elimination ( $k_{1,E}$ ) data in [Bmim][N(CF<sub>3</sub>SO<sub>2</sub>)<sub>2</sub>] **1** and acetonitrile at 8.1°C

| Mole Fraction of <b>1</b> | [Nu] / mol L <sup>-1</sup> | $k_{1,A} / 10^{-3}$ s <sup>-1</sup> | $k_{2,A} / 10^{-3}$ L mol <sup>-1</sup> s <sup>-1</sup> | $k_{-1,A} / 10^{-3}$ s <sup>-1</sup> | $k_{1,E} / 10^{-3}$ s <sup>-1</sup> | $(k_{2,A} \times k_{1,E}) \div (k_{-1,A} + k_{1,E}) /$ L mol <sup>-1</sup> s <sup>-1</sup> |
|---------------------------|----------------------------|-------------------------------------|---------------------------------------------------------|--------------------------------------|-------------------------------------|--------------------------------------------------------------------------------------------|
| 0                         | 0.182                      | 6.20                                | 33.98                                                   | 7.98                                 | 0.58                                | 2.30                                                                                       |
|                           |                            | 5.98                                | 32.77                                                   | 8.21                                 | 0.66                                | 2.46                                                                                       |
|                           |                            | 5.89                                | 32.31                                                   | 8.43                                 | 0.57                                | 2.04                                                                                       |
| 0.22                      | 0.061                      | 5.73                                | 94.3                                                    | 24.3                                 | 1.42                                | 5.18                                                                                       |
|                           |                            | 5.59                                | 92.0                                                    | 25.0                                 | 1.35                                | 4.71                                                                                       |
| 0.95                      | 0.151                      | 21.0                                | 139                                                     | 32.4                                 | 2.65                                | 10.5                                                                                       |
|                           |                            | 20.3                                | 135                                                     | 33.5                                 | 2.75                                | 10.3                                                                                       |
|                           |                            | 20.1                                | 133                                                     | 33.2                                 | 2.47                                | 9.21                                                                                       |

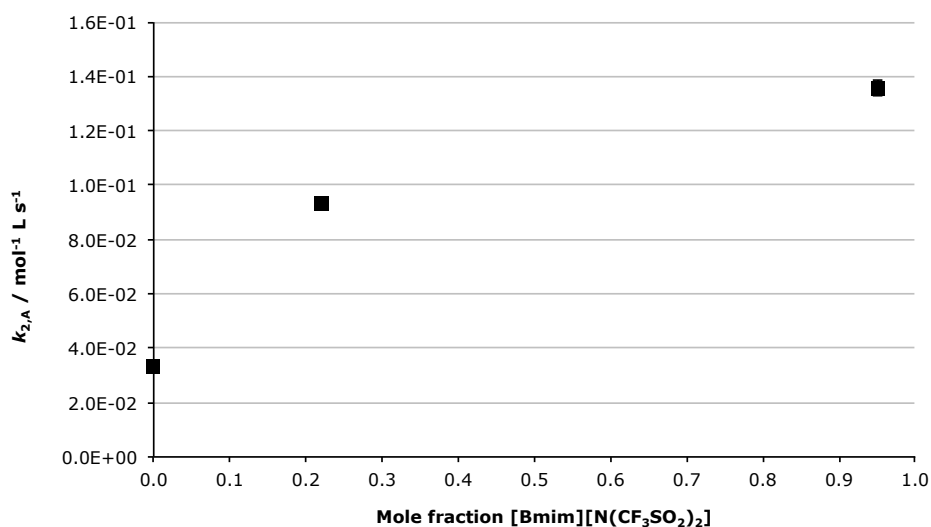

**Figure S5:** The bimolecular rate constant for the addition step ( $k_{2,A}$ ) of the reaction between 4-trifluoromethylbenzaldehyde **2e** and the amine **3** in different mole fractions of [Bmim][N(CF<sub>3</sub>SO<sub>2</sub>)<sub>2</sub>] **1** in acetonitrile at 281 K. Uncertainties are reported as the standard deviation of three replicates.

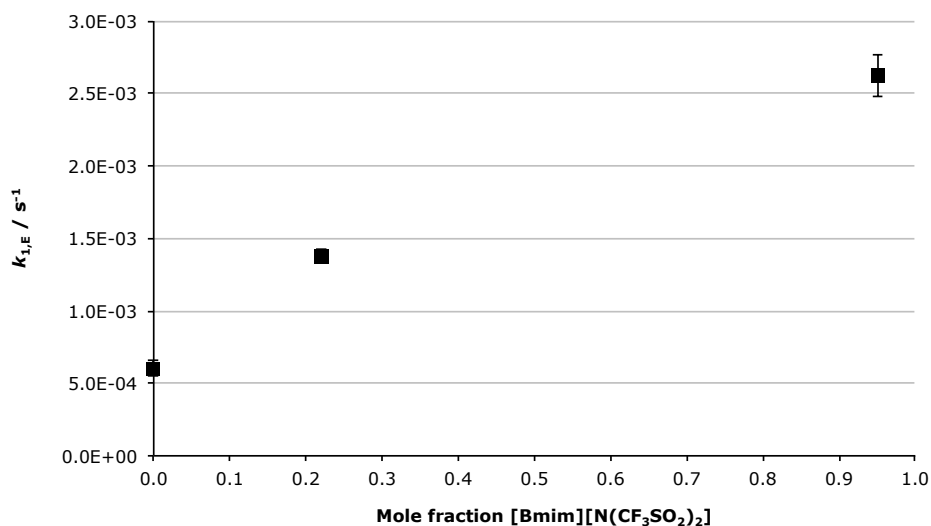

**Figure S6:** The unimolecular rate constant for the elimination step ( $k_{1,E}$ ) of the reaction between 4-trifluoromethylbenzaldehyde **2e** and the amine **3** in different mole fractions of [Bmim][N(CF<sub>3</sub>SO<sub>2</sub>)<sub>2</sub>] **1** in acetonitrile at 281 K. Uncertainties are reported as the standard deviation of three replicates.

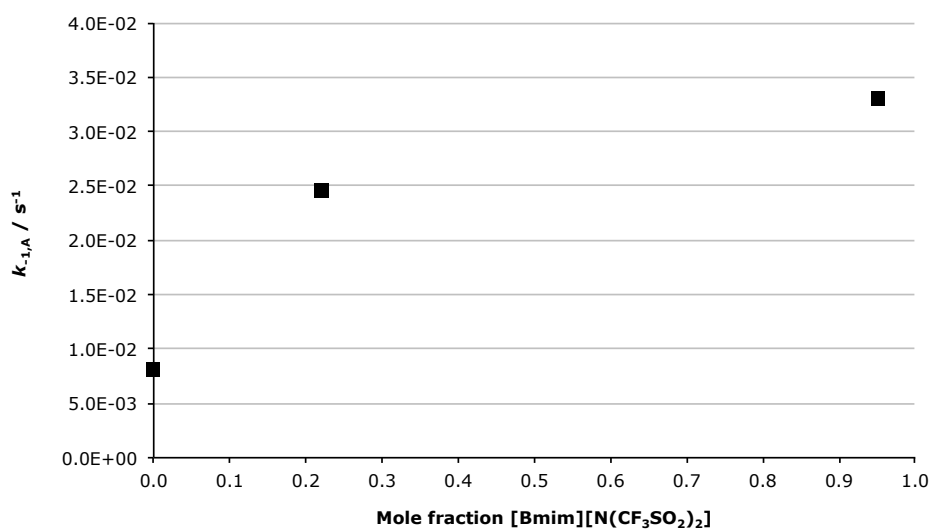

**Figure S7:** The unimolecular rate constant for the reverse addition step ( $k_{-1,A}$ ) of the reaction between 4-trifluoromethylbenzaldehyde **2e** and the amine **3** in different mole fractions of [Bmim][N(CF<sub>3</sub>SO<sub>2</sub>)<sub>2</sub>] **1** in acetonitrile at 281 K. Uncertainties are reported as the standard deviation of three replicates.

## *p*-Nitrobenzaldehyde **2f** and Hexan-1-amine **3**

Addition ( $k_{2,A}$ ), reverse addition ( $k_{-1,A}$ ) and elimination ( $k_{1,E}$ ) data in [Bmim][N(CF<sub>3</sub>SO<sub>2</sub>)<sub>2</sub>] **1** and acetonitrile at 8.1°C

| Mole Fraction of <b>1</b> | [Nu] / mol L <sup>-1</sup> | $k_{1,A} / 10^{-3}$ s <sup>-1</sup> | $k_{2,A} / 10^{-3}$ L mol <sup>-1</sup> s <sup>-1</sup> | $k_{-1,A} / 10^{-3}$ s <sup>-1</sup> | $k_{1,E} / 10^{-3}$ s <sup>-1</sup> | $(k_{2,A} \times k_{1,E}) \div (k_{-1,A} + k_{1,E}) / 10^{-3}$ L mol <sup>-1</sup> s <sup>-1</sup> |
|---------------------------|----------------------------|-------------------------------------|---------------------------------------------------------|--------------------------------------|-------------------------------------|----------------------------------------------------------------------------------------------------|
| 0                         | 0.081                      | 7.56                                | 92.7                                                    | 6.25                                 | 0.22                                | 3.16                                                                                               |
|                           |                            | 8.42                                | 103                                                     | 7.43                                 | 0.22                                | 2.91                                                                                               |
|                           |                            | 8.13                                | 99.7                                                    | 7.41                                 | 0.28                                | 3.61                                                                                               |
| 0.06                      | 0.098                      | 13.0                                | 132.4                                                   | 10.8                                 | 0.39                                | 4.65                                                                                               |
|                           |                            | 12.8                                | 129.5                                                   | 10.4                                 | 0.36                                | 4.38                                                                                               |
|                           |                            | 12.8                                | 130.2                                                   | 10.5                                 | 0.37                                | 4.44                                                                                               |
| 0.11                      | 0.105                      | 14.31                               | 136                                                     | 10.20                                | 0.52                                | 6.64                                                                                               |
|                           |                            | 18.93                               | 179.9                                                   | 14.05                                | 0.53                                | 6.53                                                                                               |
| 0.21                      | 0.063                      | 9.22                                | 146.9                                                   | 12.72                                | 0.79                                | 8.61                                                                                               |
|                           |                            | 7.19                                | 114.5                                                   | 8.70                                 | 0.68                                | 8.28                                                                                               |
|                           |                            | 8.04                                | 128.2                                                   | 9.28                                 | 0.65                                | 8.36                                                                                               |
| 0.31                      | 0.119                      | 14.86                               | 125.3                                                   | 9.71                                 | 0.73                                | 8.75                                                                                               |
|                           |                            | 14.53                               | 122.5                                                   | 9.98                                 | 0.69                                | 7.93                                                                                               |
| 0.41                      | 0.087                      | 13.49                               | 154.3                                                   | 13.24                                | 0.74                                | 8.17                                                                                               |
|                           |                            | 13.44                               | 153.7                                                   | 13.37                                | 0.78                                | 8.46                                                                                               |
|                           |                            | 13.41                               | 153.3                                                   | 13.65                                | 0.82                                | 8.64                                                                                               |
| 0.51                      | 0.058                      | 9.42                                | 161.5                                                   | 15.09                                | 1.13                                | 11.29                                                                                              |
|                           |                            | 8.58                                | 147.2                                                   | 14.43                                | 1.17                                | 11.07                                                                                              |
|                           |                            | 8.81                                | 151.1                                                   | 15.14                                | 1.04                                | 9.69                                                                                               |
| 0.61                      | 0.057                      | 10.14                               | 176.8                                                   | 16.27                                | 1.55                                | 15.39                                                                                              |
|                           |                            | 13.10                               | 228.6                                                   | 22.40                                | 1.31                                | 12.67                                                                                              |
|                           |                            | 12.74                               | 222.4                                                   | 22.31                                | 1.28                                | 12.04                                                                                              |
| 0.69                      | 0.070                      | 18.21                               | 259.5                                                   | 27.85                                | 1.22                                | 10.85                                                                                              |
|                           |                            | 17.54                               | 250.0                                                   | 28.74                                | 1.66                                | 13.64                                                                                              |
|                           |                            | 17.44                               | 248.5                                                   | 28.42                                | 1.45                                | 12.07                                                                                              |
| 0.78                      | 0.070                      | 18.13                               | 260.3                                                   | 27.77                                | 1.28                                | 11.45                                                                                              |
|                           |                            | 18.27                               | 262.2                                                   | 28.09                                | 1.25                                | 11.17                                                                                              |
|                           |                            | 19.10                               | 274.1                                                   | 27.99                                | 1.17                                | 11.00                                                                                              |
| 0.87                      | 0.089                      | 21.33                               | 239.8                                                   | 29.77                                | 1.32                                | 10.17                                                                                              |
|                           |                            | 22.27                               | 250.4                                                   | 27.09                                | 1.28                                | 11.29                                                                                              |
|                           |                            | 23.10                               | 259.7                                                   | 29.90                                | 1.20                                | 10.02                                                                                              |



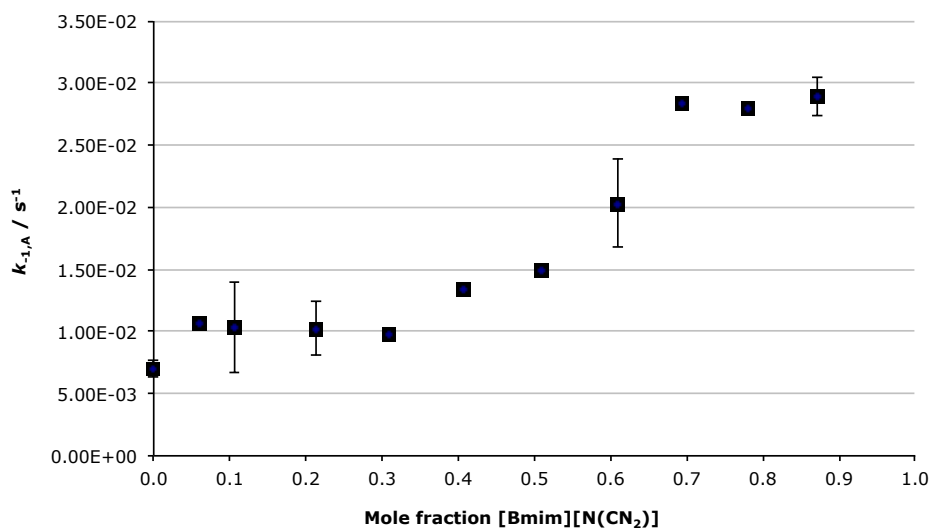

**Figure S8:** The unimolecular rate constant for the reverse addition step ( $k_{-1,A}$ ) of the reaction between 4-nitrobenzaldehyde **2f** and the amine **3** in different mole fractions of  $[\text{Bmim}][\text{N}(\text{CF}_3\text{SO}_2)_2]$  **1** in acetonitrile at 281 K. Uncertainties are reported as the standard deviation of three replicates.

## Hammett Plots:

### Acetonitrile using the rate constant of the addition step ( $k_{2,A}$ )

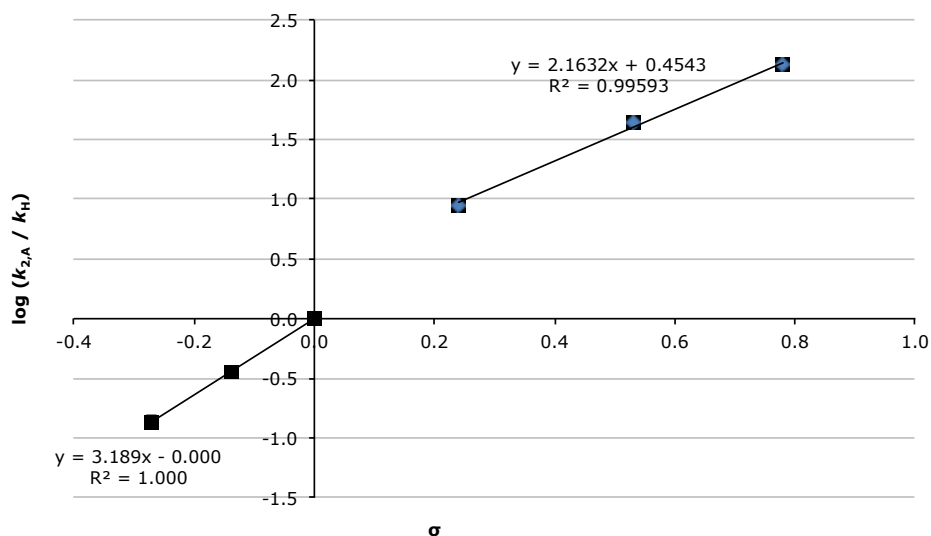

**Figure S9:** Hammett plot of the second order rate constant for the addition step ( $k_{2,A}$ ) of the reaction between benzaldehydes **2a-f** and the amine **3** in acetonitrile at 281 K. Uncertainties are reported as the standard deviation of three replicates.

### [Bmim][N(CF<sub>3</sub>SO<sub>2</sub>)<sub>2</sub>]**1** and acetonitrile, $\chi_{IL} = 0.9$ , using the rate constant of the addition step ( $k_{2,A}$ )

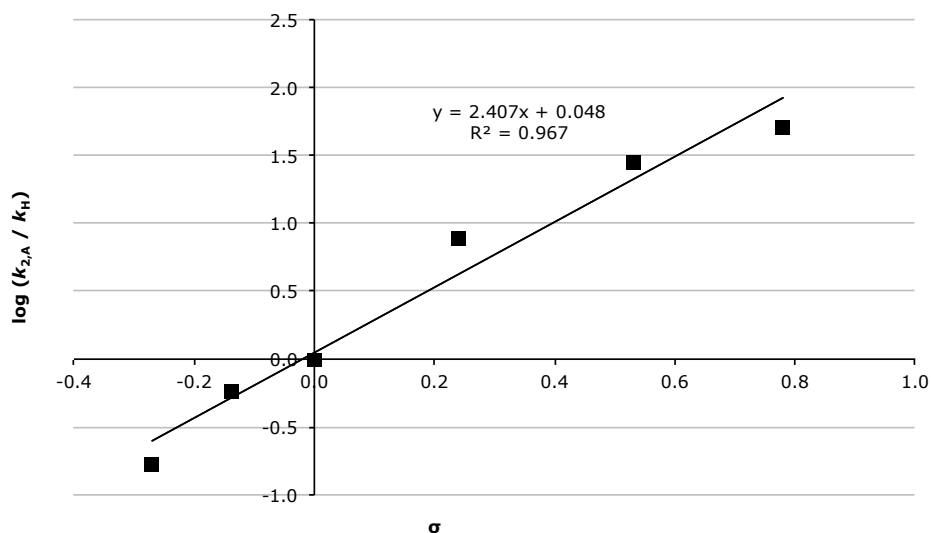

**Figure S10:** Hammett plots of the second order rate constant for the addition step ( $k_{2,A}$ ) of the reaction between benzaldehydes **2a-f** and the amine **3** in [Bmim][N(CF<sub>3</sub>SO<sub>2</sub>)<sub>2</sub>]**1** ( $\chi_{IL}$  ca. 0.9) at 281 K. Uncertainties are reported as the standard deviation of three replicates.

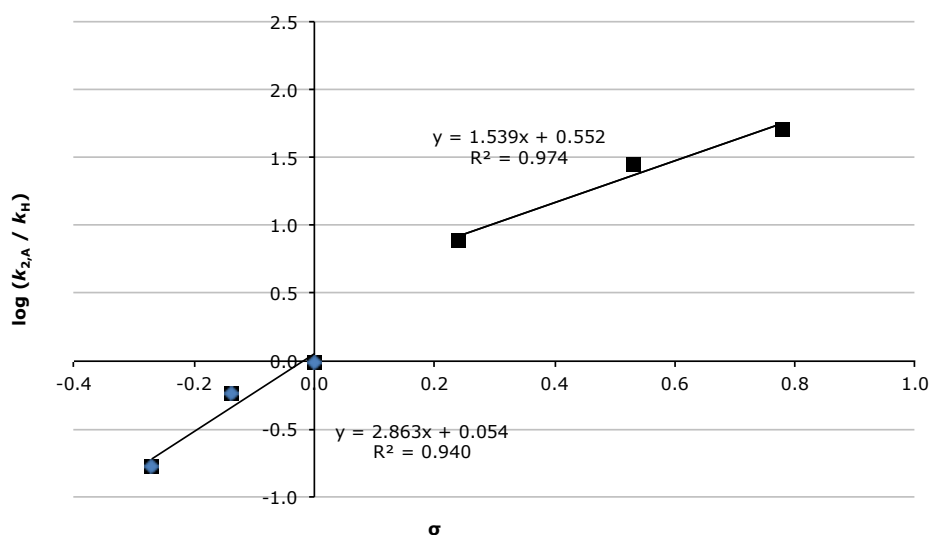

**Figure S11:** Hammett plots of the second order rate constant for the addition step ( $k_{2,A}$ ) of the reaction between benzaldehydes **2a-f** and the amine **3** in [Bmim][N(CF<sub>3</sub>SO<sub>2</sub>)<sub>2</sub>] **1** ( $\chi_{IL}$  ca. 0.9) at 281 K. Uncertainties are reported as the standard deviation of three replicates.

[Bmim][N(CF<sub>3</sub>SO<sub>2</sub>)<sub>2</sub>] **1** and acetonitrile,  $\chi_{IL} = 0.2$ , using the rate constant of the elimination step ( $k_{1,E}$ )

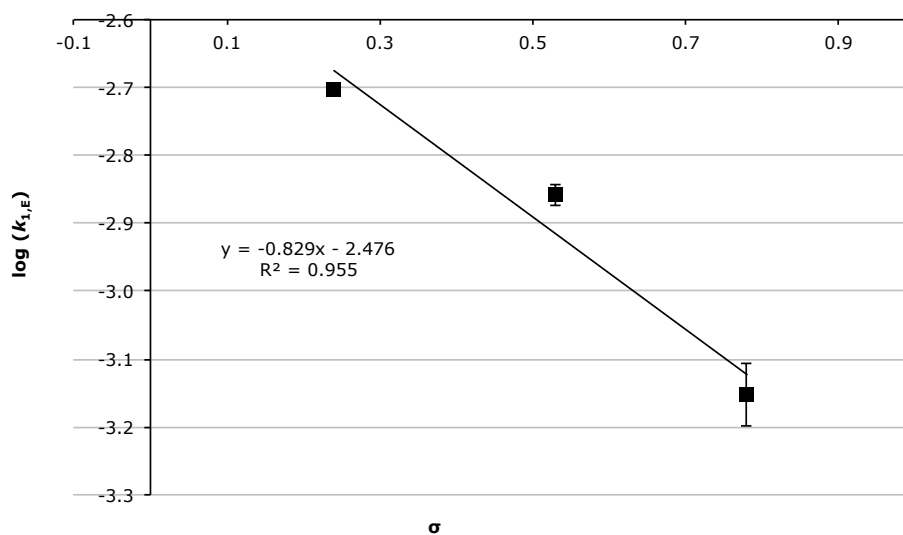

**Figure S12:** Log plot of the first order rate constant for the elimination step ( $k_{1,E}$ ) of the reaction between benzaldehydes **2c-f** and the amine **3** in [Bmim][N(CF<sub>3</sub>SO<sub>2</sub>)<sub>2</sub>] **1** / acetonitrile ( $\chi_{IL}$  ca. 0.2) at 281 K. Uncertainties are reported as the standard deviation of three replicates

[Bmim][N(CF<sub>3</sub>SO<sub>2</sub>)<sub>2</sub>] **1** and acetonitrile,  $\chi_{IL} = 0.9$ , using the rate constant of the elimination step ( $k_{1,E}$ )

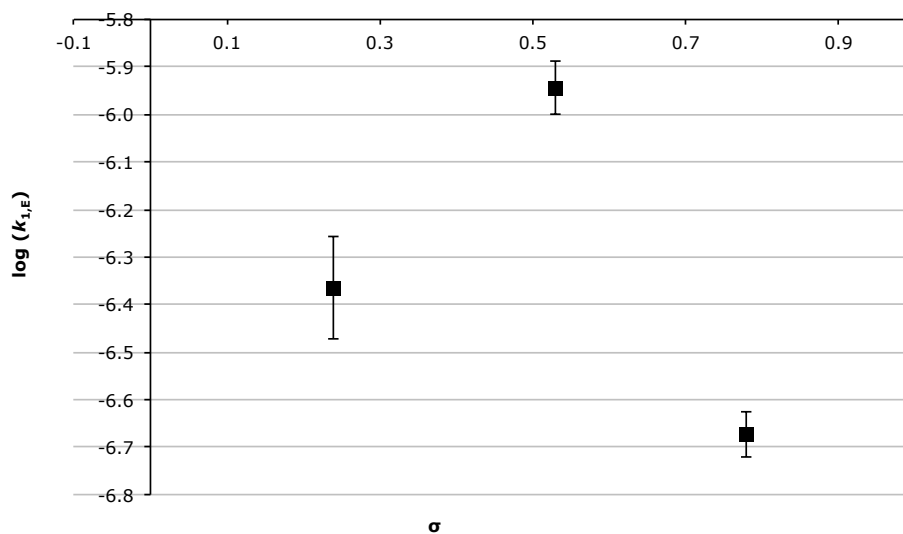

**Figure S13:** Log plot of the first order rate constant for the elimination step ( $k_{1,E}$ ) of the reaction between benzaldehydes **2c-f** and the amine **3** in [Bmim][N(CF<sub>3</sub>SO<sub>2</sub>)<sub>2</sub>] **1** ( $\chi_{IL}$  ca. 0.9) at 281 K. Uncertainties are reported as the standard deviation of three replicates

[Bmim][N(CF<sub>3</sub>SO<sub>2</sub>)<sub>2</sub>] **1** and acetonitrile,  $\chi_{IL} = 0.2$ , using the rate constant of the reverse addition step ( $k_{-1,A}$ )

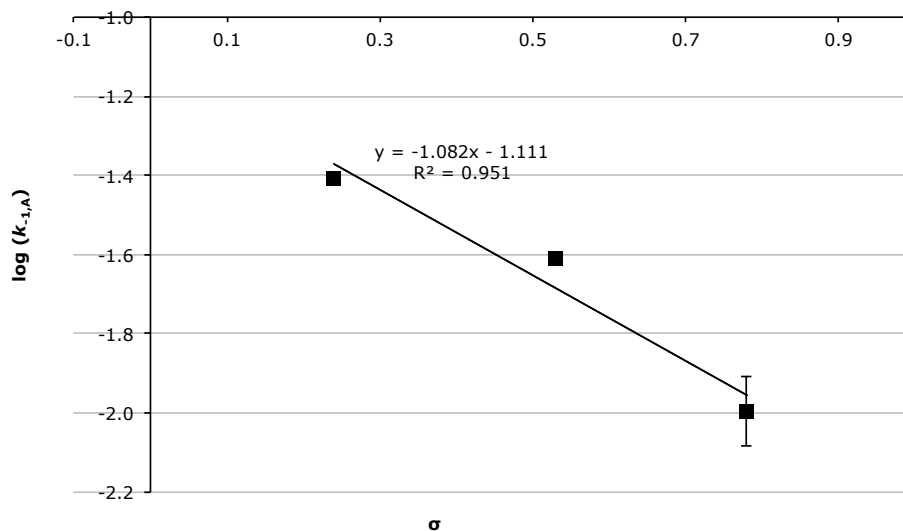

**Figure S14:** Log plot of the first order rate constant for the reverse of the addition step ( $k_{-1,A}$ ) of the reaction between benzaldehydes **2c-f** and the amine **3** in [Bmim][N(CF<sub>3</sub>SO<sub>2</sub>)<sub>2</sub>] **1** / acetonitrile ( $\chi_{IL}$  ca. 0.2) at 281 K. Uncertainties are reported as the standard deviation of three replicates

[Bmim][N(CF<sub>3</sub>SO<sub>2</sub>)<sub>2</sub>] 1 and acetonitrile,  $\chi_{IL} = 0.9$ , using the rate constant of the reverse addition step ( $k_{-1,A}$ )

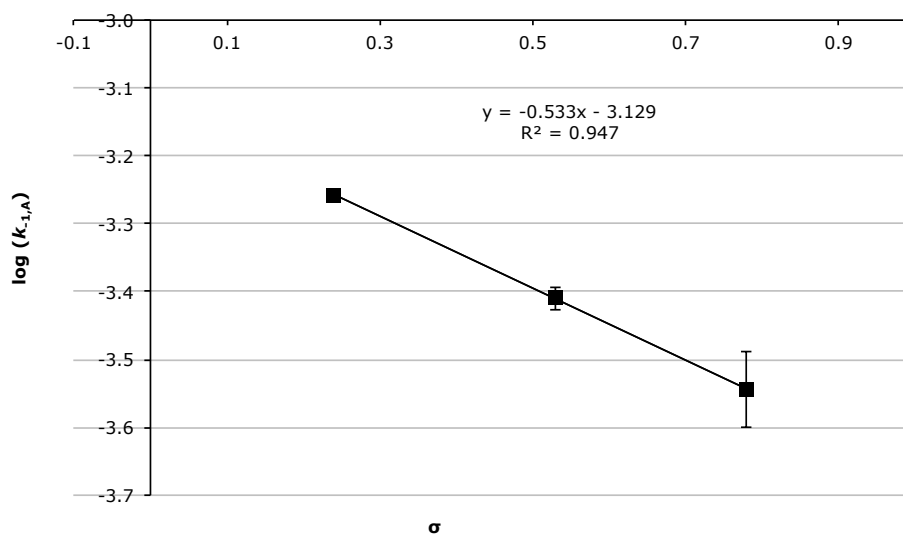

**Figure S15:** Log plot of the first order rate constant for the reverse of the addition step ( $k_{-1,A}$ ) of the reaction between benzaldehydes **2c-f** and the amine **3** in [Bmim][N(CF<sub>3</sub>SO<sub>2</sub>)<sub>2</sub>] **1** ( $\chi_{IL}$  ca. 0.9) at 281 K. Uncertainties are reported as the standard deviation of three replicates

[Bmim][N(CF<sub>3</sub>SO<sub>2</sub>)<sub>2</sub>] 1 and acetonitrile,  $\chi_{IL} = 0.9$ , using the rate constant of the overall addition elimination process ( $k_{2,app}$ )

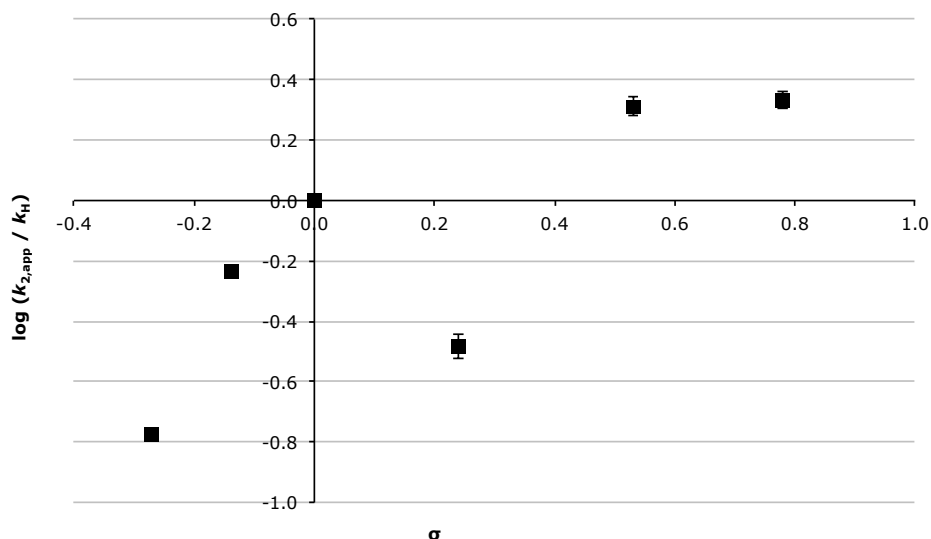

**Figure S16:** Hammett plot of the observed second order rate constant ( $k_{2,app}$ ) for the reaction between benzaldehydes **2a-f** and the amine **3** in [Bmim][N(CF<sub>3</sub>SO<sub>2</sub>)<sub>2</sub>] **1** ( $\chi_{IL}$  ca. 0.9) at 281 K. Uncertainties are reported as the standard deviation of three replicates.

## Activation Parameter Data

*p*-Chlorobenzaldehyde **2d** and hexan-1-amine **3**, addition step ( $k_{2,A}$ )

| Mole Fraction<br>of 1 | Temperature /<br>°C | [Nu] / mol L <sup>-1</sup> | $k_{1,A}$<br>/ 10 <sup>-3</sup> s <sup>-1</sup> | $k_{2,A}$<br>/ 10 <sup>-3</sup> L mol <sup>-1</sup> s <sup>-1</sup> |
|-----------------------|---------------------|----------------------------|-------------------------------------------------|---------------------------------------------------------------------|
| 0                     | 1.6                 | 0.187                      | 0.704                                           | 3.77                                                                |
|                       |                     |                            | 0.883                                           | 4.72                                                                |
|                       | 14.5                | 0.147                      | 2.749                                           | 14.69                                                               |
|                       |                     |                            | 1.987                                           | 10.62                                                               |
|                       |                     |                            | 1.905                                           | 10.18                                                               |
|                       | 8.1                 | 0.157                      | 1.046                                           | 7.12                                                                |
|                       |                     |                            | 0.952                                           | 6.49                                                                |
|                       |                     |                            | 0.970                                           | 6.61                                                                |
|                       | -3.4                | 0.325                      | 0.439                                           | 2.79                                                                |
|                       |                     |                            | 0.443                                           | 2.82                                                                |
|                       |                     |                            | 11.247                                          | 34.56                                                               |
|                       | 0.22                | 8.1                        | 0.325                                           | 10.514                                                              |
| 10.318                |                     |                            |                                                 | 31.71                                                               |
| 8.133                 |                     |                            |                                                 | 24.99                                                               |
| 2.6                   |                     | 0.325                      | 7.470                                           | 22.96                                                               |
|                       |                     |                            | 7.297                                           | 22.42                                                               |
|                       |                     |                            | 3.496                                           | 10.74                                                               |
| -3.6                  |                     | 0.325                      | 3.447                                           | 10.59                                                               |
|                       |                     |                            | 2.559                                           | 7.86                                                                |
|                       |                     |                            | 2.664                                           | 8.19                                                                |
|                       |                     |                            | 2.282                                           | 7.01                                                                |

*p*-Chlorobenzaldehyde **2d** and hexan-1-amine **3**, elimination step ( $k_{1,E}$ )

| Mole Fraction<br>of <b>1</b> | Temperature /<br>°C | [Nu] / mol L <sup>-1</sup> | $k_{1,E}$<br>/ 10 <sup>-3</sup> s <sup>-1</sup> |     |       |      |
|------------------------------|---------------------|----------------------------|-------------------------------------------------|-----|-------|------|
| 0                            | 8.1                 | 0.146                      | 1.76                                            |     |       |      |
|                              |                     |                            | 1.61                                            |     |       |      |
|                              |                     |                            | 1.80                                            |     |       |      |
|                              | 1.6                 | 0.187                      | 0.51                                            |     |       |      |
|                              |                     |                            | 0.61                                            |     |       |      |
|                              |                     |                            | 0.47                                            |     |       |      |
|                              |                     |                            | 2.40                                            |     |       |      |
|                              |                     |                            | 2.91                                            |     |       |      |
|                              |                     |                            | 2.20                                            |     |       |      |
|                              | -3.7                |                            | 0.20                                            |     |       |      |
|                              |                     |                            | 0.23                                            |     |       |      |
|                              |                     |                            | 0.17                                            |     |       |      |
|                              |                     |                            | 0.22                                            | 8.1 | 0.325 | 2.01 |
|                              |                     |                            |                                                 |     |       | 1.96 |
|                              |                     |                            |                                                 |     |       | 2.00 |
| 2.6                          |                     | 1.11                       |                                                 |     |       |      |
|                              |                     | 1.13                       |                                                 |     |       |      |
|                              |                     | 1.21                       |                                                 |     |       |      |
| -3.6                         |                     | 0.46                       |                                                 |     |       |      |
|                              |                     | 0.46                       |                                                 |     |       |      |
|                              |                     | 0.51                       |                                                 |     |       |      |
| -9.9                         |                     | 0.27                       |                                                 |     |       |      |
|                              |                     | 0.24                       |                                                 |     |       |      |
|                              |                     | 0.22                       |                                                 |     |       |      |

*p*-Trifluoromethylbenzaldehyde **2e** and hexan-1-amine **3**, elimination step ( $k_{1,E}$ )

| Mole Fraction<br>of <b>1</b> | Temperature /<br>°C | [Nu] / mol L <sup>-1</sup> | $k_{1,E}$<br>/ 10 <sup>-3</sup> s <sup>-1</sup> |       |      |
|------------------------------|---------------------|----------------------------|-------------------------------------------------|-------|------|
| 0                            | 8.1                 | 0.182                      | 0.58                                            |       |      |
|                              |                     |                            | 0.66                                            |       |      |
|                              |                     |                            | 0.57                                            |       |      |
|                              | 18.9                |                            | 1.74                                            |       |      |
|                              |                     |                            | 1.49                                            |       |      |
|                              |                     |                            | 1.46                                            |       |      |
|                              | 14.5                |                            | 0.96                                            |       |      |
|                              |                     |                            | 0.84                                            |       |      |
|                              |                     |                            | 0.86                                            |       |      |
|                              | 24.8                |                            | 2.23                                            |       |      |
|                              |                     |                            | 2.30                                            |       |      |
|                              |                     |                            | 2.21                                            |       |      |
| 0.22                         | 8.1                 | 0.061                      | 1.42                                            |       |      |
|                              |                     |                            | 1.35                                            |       |      |
|                              |                     |                            | 1.17                                            |       |      |
|                              | 14.3                |                            | 2.93                                            |       |      |
|                              |                     |                            | 2.49                                            |       |      |
|                              |                     |                            | 2.70                                            |       |      |
|                              | 1.4                 |                            | 0.095                                           | 0.81  |      |
|                              |                     |                            |                                                 | 0.79  |      |
|                              |                     |                            |                                                 | 0.82  |      |
|                              | -3.6                |                            |                                                 | 0.154 | 0.33 |
|                              |                     |                            |                                                 |       | 0.31 |
|                              |                     |                            |                                                 |       | 0.32 |
| 0.95                         | 13.0                | 0.151                      |                                                 |       | 3.86 |
|                              |                     |                            |                                                 |       | 3.85 |
|                              |                     |                            |                                                 |       | 4.38 |
|                              | 8.1                 |                            |                                                 |       | 2.65 |
|                              |                     |                            |                                                 |       | 2.75 |
|                              |                     |                            |                                                 |       | 2.47 |
|                              | -3.6                |                            | 0.66                                            |       |      |
|                              |                     |                            | 0.66                                            |       |      |
|                              |                     |                            | 0.76                                            |       |      |
|                              | 2.3                 |                            | 1.28                                            |       |      |
|                              |                     |                            | 1.22                                            |       |      |
|                              |                     |                            | 1.28                                            |       |      |



*p*-Nitrobenzaldehyde **2f** and hexan-1-amine **3**, elimination step ( $k_{1,E}$ )

| Mole Fraction<br>of <b>1</b> | Temperature /<br>°C | [Nu] / mol L <sup>-1</sup> | $k_{1,E}$<br>/ 10 <sup>-3</sup> s <sup>-1</sup> |       |
|------------------------------|---------------------|----------------------------|-------------------------------------------------|-------|
| 0                            | 8.1                 | 0.082                      | 0.221                                           |       |
|                              |                     |                            | 0.215                                           |       |
|                              |                     |                            | 0.278                                           |       |
|                              | 13.0                |                            | 0.342                                           |       |
|                              |                     |                            | 0.452                                           |       |
|                              |                     |                            | 0.392                                           |       |
|                              | 23.7                |                            | 0.935                                           |       |
|                              |                     |                            | 0.798                                           |       |
|                              |                     |                            | 0.594                                           |       |
|                              | 18.2                |                            | 0.621                                           |       |
|                              |                     |                            | 0.542                                           |       |
|                              |                     |                            | 0.124                                           |       |
| -0.6                         | 0.078               | 0.138                      |                                                 |       |
|                              |                     | 0.393                      |                                                 |       |
|                              |                     | 0.363                      |                                                 |       |
|                              |                     | 0.372                      |                                                 |       |
|                              |                     | 0.686                      |                                                 |       |
|                              |                     | 0.694                      |                                                 |       |
| 0.06                         | 8.1                 | 0.099                      | 0.752                                           |       |
|                              |                     |                            | 0.099                                           |       |
|                              |                     |                            | 0.092                                           |       |
|                              | 0.093               |                            |                                                 |       |
|                              | 13.7                |                            | 0.238                                           |       |
|                              |                     |                            | 0.153                                           |       |
| 0.208                        |                     |                            |                                                 |       |
| -3.6                         | 0.099               | 0.208                      | 0.520                                           |       |
|                              |                     |                            | 0.472                                           |       |
|                              |                     |                            | 0.474                                           |       |
|                              |                     |                            | 0.504                                           |       |
|                              |                     |                            | 23.3                                            | 2.927 |
|                              |                     |                            |                                                 | 3.372 |
|                              |                     |                            |                                                 | 3.024 |
|                              |                     |                            | 15.8                                            | 1.528 |
|                              |                     |                            |                                                 | 1.368 |
|                              |                     |                            |                                                 | 1.646 |
|                              |                     |                            | 2.4                                             | 0.230 |
|                              |                     |                            |                                                 | 0.198 |
| 0.237                        |                     |                            |                                                 |       |

| Mole Fraction<br>of 1 | Temperature /<br>°C | [Nu] / mol L <sup>-1</sup> | $k_{1,E}$<br>/ 10 <sup>-3</sup> s <sup>-1</sup> |
|-----------------------|---------------------|----------------------------|-------------------------------------------------|
| 0.88                  | 8.1                 | 0.089                      | 1.318                                           |
|                       |                     |                            | 1.280                                           |
|                       | 2.3                 | 0.082                      | 1.200                                           |
|                       |                     |                            | 0.393                                           |
|                       |                     |                            | 0.577                                           |
|                       |                     |                            | 0.527                                           |
|                       |                     |                            | 1.623                                           |
|                       |                     |                            | 1.800                                           |
|                       | -3.3                |                            | 1.648                                           |
|                       |                     |                            | 0.258                                           |
|                       |                     |                            | 0.297                                           |
|                       |                     |                            | 0.248                                           |
|                       |                     |                            | 1.318                                           |
|                       |                     |                            |                                                 |
